# Supplementary material for: Review of rationale and progress toward targeting cyclin-dependent kinase 2 (CDK2) for male contraception
Source: PubMed Central journal article supplement (PMC7523694; doi:10.1093/biolre/ioaa107), 2020-06-16
Supplement: fig_s5_ioaa107.pdf [file fig_s5_ioaa107.pdf]

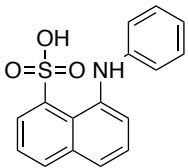

**ANS**

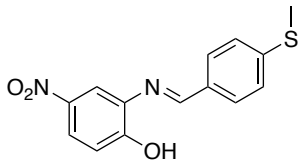

**B2**

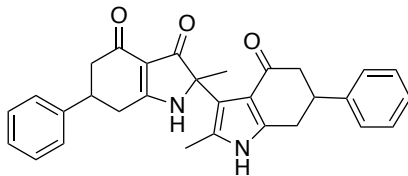

**DPIT**

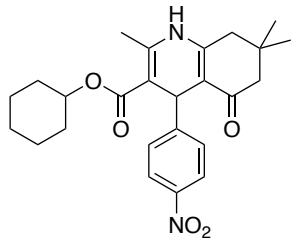

**FLI-06**

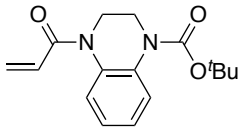

**Compound 1**

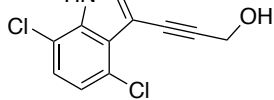

**Compound 2**

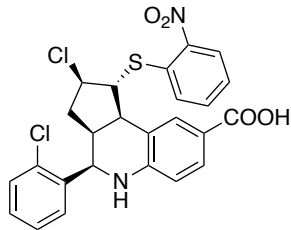

**Compound 3f**
